# Supplementary material for: 1,4-Benzene-bridged covalent hybrid of triarylamine and cyclometalated ruthenium: a new type of organic–inorganic mixed-valent system
Source: Royal Society of Chemistry journal article supplement (doi:10.1039/c2cc32471g), 2012-01-01
Supplement: c2cc32471g.pdf [file c2cc32471g.pdf]

Supporting Information for:

# **1,4-Benzene-Bridged Covalent Hybrid of Triarylamine and Cyclometalated Ruthenium: A New Type of Organic-Inorganic Mixed-Valent System**

**Chang-Jiang Yao,<sup>†</sup> Ren-Hui Zheng,<sup>†</sup> Qiang Shi,<sup>†</sup> Yu-Wu Zhong,<sup>\*,†,‡</sup> and Jiannian Yao<sup>†</sup>**

<sup>†</sup>Beijing National Laboratory for Molecular Sciences, CAS Key Laboratory of Photochemistry, Institute of Chemistry, Chinese Academy of Sciences, Beijing 100190, P. R. China.

<sup>‡</sup>State Key Laboratory of Coordination Chemistry, Nanjing University, Nanjing 210093, People's Republic of China

---

## **\*Correspondance:**

Prof. Yu-Wu Zhong

CAS Key laboratory of photochemistry

Institute of Chemistry, Chinese Academy of Sciences

Beijing 100190, China

Email: [zhongyuwu@iccas.ac.cn](mailto:zhongyuwu@iccas.ac.cn)

Website: <http://zhongyuwu.iccas.ac.cn/>

---

## 1. Synthetic Procedures and Characterization

**General.** NMR spectra were recorded in the designated solvent on Bruker Avance 400 MHz spectrometer. Spectra are reported in ppm values from residual protons of deuterated solvent for  $^1\text{H}$  NMR ( $\delta$  7.26 ppm for  $\text{CDCl}_3$  and 1.92 ppm for  $\text{CD}_3\text{CN}$ ) and  $^{13}\text{C}$  NMR ( $\delta$  77.00 ppm for  $\text{CDCl}_3$ ). MS data were obtained with a Bruker Daltonics Inc. ApexII FT-ICR or Autoflex III MALDI-TOF mass spectrometer. The matrix for MALDI-TOF measurement is  $\alpha$ -cyano-4-hydroxycinnamic acid. Microanalysis was carried out using Flash EA 1112 or Carlo Erba 1106 analyzer at the Institute of Chemistry, Chinese Academy of Sciences.

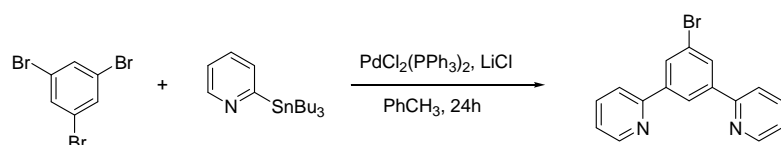

To a solution of 1,3,5-tribromobenzene (1.0 mmol, 320 mg) and 2-(tributylstannyl)pyridine (2.2 mmol, 810 mg) in 20 mL dry toluene were added  $\text{PdCl}_2(\text{PPh}_3)_2$  (0.2 mmol, 140 mg) and  $\text{LiCl}$  (10 mmol, 424 mg) under a  $\text{N}_2$  atmosphere. The mixture was bubbled with nitrogen for 10 min before the vial was capped and heated at  $150^\circ\text{C}$  for 48 h. After the reaction was cooled to room temperature, the solvent was removed under reduced pressure. The residue was then subjected to column chromatography on silica gel (eluent:  $\text{CH}_2\text{Cl}_2$ /ethyl acetate/ $\text{NH}_4\text{OH}$  100/10/0.05) to afford 106 mg 3,5-di(2-pyridyl)bromobenzene as a yellow solid in a yield of 34%.  $^1\text{H}$  NMR (400 MHz,  $\text{CDCl}_3$ ):  $\delta$  7.28 (m, 2H), 7.80 (m, 4H), 8.21 (s, 2H), 8.54 (s, 1H), 8.70 (d,  $J = 4.6$  Hz, 2 H).

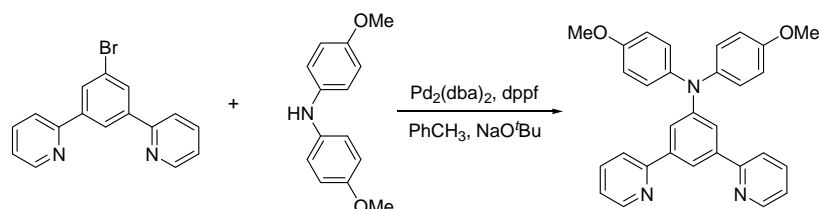

To a solution of 3,5-di(2-pyridyl)bromobenzene (1.0 mmol, 323 mg) and 4,4'-dimethoxydiphenylamine (1.5 mmol, 344 mg) in 20 mL dry toluene were added  $\text{Pd}_2(\text{dba})_3$  (0.02 mmol, 18.3 mg), 1,1'-bis(diphenylphosphino)ferrocene ( $\text{dppf}$ ) (0.02 mmol, 11.1 mg) and  $\text{NaO}^t\text{Bu}$  (1.2 mmol, 115.3 mg) under a  $\text{N}_2$  atmosphere. The mixture was bubbled with nitrogen for 10 min before the vial was capped and heated at  $130^\circ\text{C}$

for 48 h. After the reaction was cooled to room temperature, the solvent was removed under reduced pressure. The residue was then subjected to column chromatography on silica gel (eluent:  $\text{CH}_2\text{Cl}_2$ /ethyl acetate/ $\text{NH}_4\text{OH}$  75/6/1) to afford 317 mg 1-di-*p*-anisylamino-3,5-di(2-pyridyl)benzene as a yellow solid in a yield of 69%.  $^1\text{H}$  NMR (400 MHz,  $\text{CDCl}_3$ ):  $\delta$  3.78 (s, 6 H), 6.82 (d,  $J = 8.3\text{ Hz}$ , 4 H), 7.10 (d,  $J = 8.3\text{ Hz}$ , 4 H), 7.18 (t,  $J = 5.3\text{ Hz}$ , 2 H), 7.65 (s, 2 H), 7.67 (d,  $J = 5.3\text{ Hz}$ , 4 H), 8.12 (s, 1 H), 8.63 (d,  $J = 4.3\text{ Hz}$ , 2 H).  $^{13}\text{C}$  NMR (100 MHz,  $\text{CDCl}_3$ ):  $\delta$  55.4, 114.7, 118.4, 120.3, 120.8, 122.1, 126.3, 126.4, 136.6, 140.8, 141.1, 149.4, 155.6, 157.2. EI-MS ( $m/z$ ): 537  $[\text{M} + 2\text{K}]^+$ .

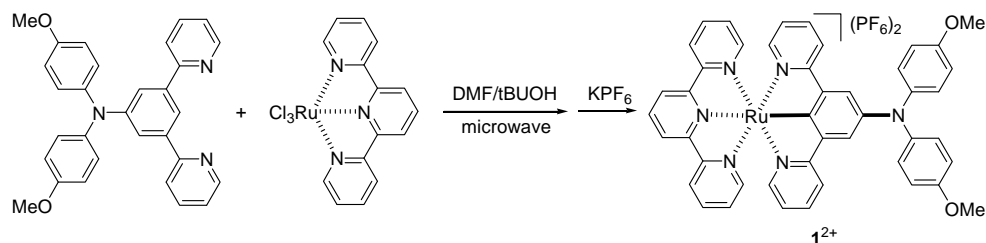

To a mixture of 3 mL DMF and 3 mL *t*-BuOH were added 1-di-*p*-anisylamino-3,5-di(2-pyridyl)benzene (0.1 mmol, 46 mg) and  $\text{Ru}(\text{tpy})\text{Cl}_3$  (0.1 mmol, 44 mg). The mixture was heated under microwave conditions for 50 min at a power of 200 W and then another 30 min at a power of 375 W. After cooling down to room temperature, an excess of aqueous  $\text{KPF}_6$  were added. The resulting precipitate was collected by filtration and wash successively with water and ether. The crude product was purified by column chromatography on silica using acetonitrile/water/saturated aq.  $\text{KNO}_3$  30/1/0.05 as the eluent to give 56 mg **[1]** $(\text{PF}_6)_2$  as a black solid (yield: 52%). MALDI-MS ( $m/z$ ): 792.2 for  $[\text{M}-2\text{PF}_6]^{2+}$ . Anal. Calcd for:  $\text{C}_{45}\text{H}_{35}\text{F}_{12}\text{N}_6\text{O}_2\text{P}_2\text{Ru}\cdot 2\text{H}_2\text{O}$ : C, 48.31; H, 3.51; N, 7.51. Found: C, 48.64; H, 3.28; N, 7.65.

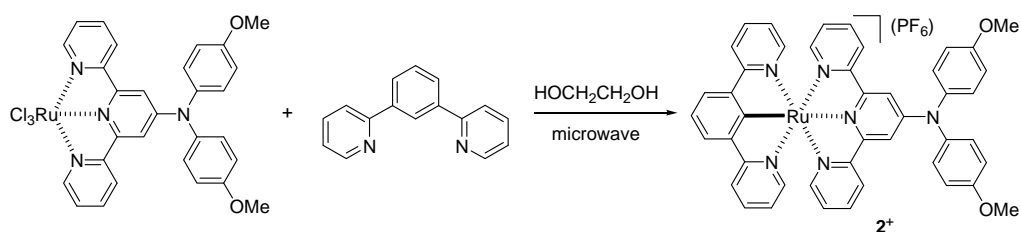

To 5 mL ethylene glycol were added [(2,3-di(2-pyridyl)-4-di-

*p*-anisylaminopyridine)RuCl<sub>3</sub>]<sup>1</sup> (0.05 mmol, 33.4 mg), 1,3-di(2-pyridyl)benzene (0.05 mmol, 11.6 mg). The mixture was heated under microwave conditions (power = 375 W) for 30 min. After cooling down to room temperature, an excess of aqueous KPF<sub>6</sub> were added. The resulting precipitate was collected by filtration and washing successively with water and ether. The crude product was purified by column chromatography on silica using acetonitrile/water/saturated KNO<sub>3</sub> 30/1/0.05 as the eluent to give 16 mg [2](PF<sub>6</sub>) as a black solid (34% yield). <sup>1</sup>H NMR (400 MHz, CD<sub>3</sub>CN): δ 3.87 (s, 6 H), 6.74 (t, *J* = 6.6 Hz, 2 H), 6.81 (t, *J* = 6.6 Hz, 2 H), 6.94 (d, *J* = 5.5 Hz, 2 H), 7.11 (d, *J* = 8.6 Hz, 4 H), 7.27 (d, *J* = 5.5 Hz, 2 H), 7.48-7.52 (m, 6 H), 7.61 (t, *J* = 7.8 Hz, 2 H), 7.96 (s, 2 H), 7.99 (d, *J* = 8.0 Hz, 2 H), 8.12 (d, *J* = 8.0 Hz, 2 H), 8.20 (d, *J* = 7.5 Hz, 2 H). MALDI-MS (*m/z*): 793.1 for [M-PF<sub>6</sub>]<sup>+</sup>. Anal. Calcd. for C<sub>45</sub>H<sub>35</sub>F<sub>6</sub>N<sub>6</sub>O<sub>2</sub>PRu·H<sub>2</sub>O: C, 56.54; H, 3.90; N, 8.79. Found: C, 56.05; H, 3.76; N, 8.85.

<sup>1</sup>H NMR spectrum of [2](PF<sub>6</sub>):

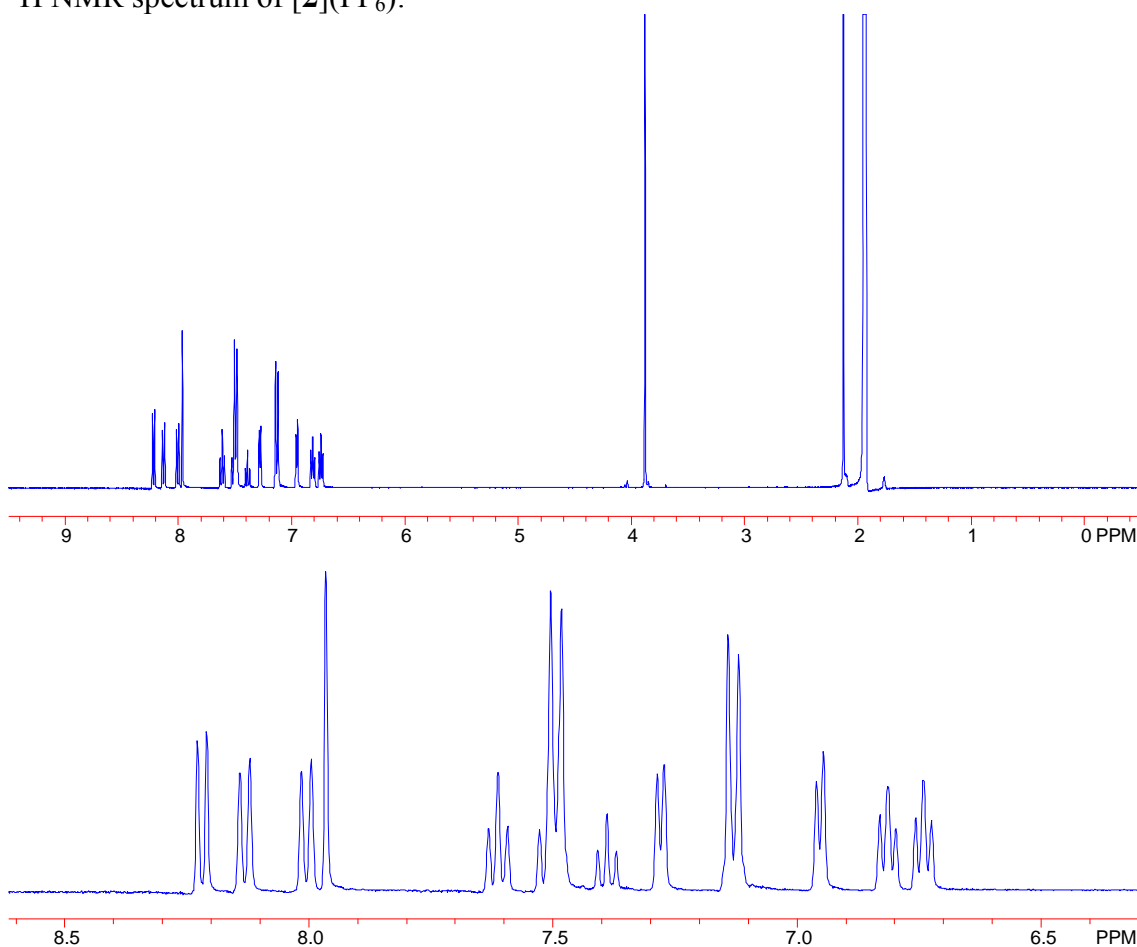

(1) Yao, C.-J.; Yao, J.; Zhong, Y.-W. *Inorg. Chem.* **2011**, *50*, 6847.

## 2. Computational Method

DFT and TDDFT calculations are carried out using the B3LYP exchange correlation functional<sup>2</sup> and implemented in the *Gaussian* 03 program package.<sup>3</sup> The electronic structures of complexes were determined using a general basis set with the Los Alamos effective core potential LanL2DZ basis set for ruthenium, and 6-31G\* for other atoms in vacuum.<sup>4</sup> All orbitals have been computed at an isovalue of 0.02.

The initial structures for **1**<sup>+</sup> and **2**<sup>+</sup> were generated on the basis of a known single-crystal structure of the following complex<sup>1</sup> by removing one di-*p*-anisylamino segment and replacing one nitrogen atom with a carbon atom. The calculated lengths of the Ru-C bond for **1**<sup>+</sup> and **2**<sup>+</sup> are 1.983 and 1.975 Å, respectively. Other Ru-N lengths are in the range of 2.07~1.15 Å. This is quite reasonable compared to known single-crystal structures of known cyclometalated ruthenium complexes.<sup>5</sup>

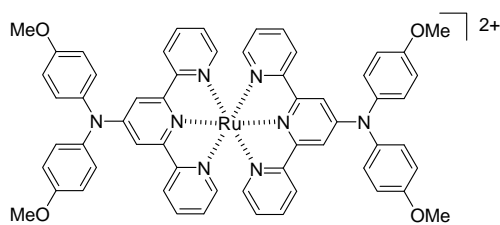

(2) (a) Becke, A. D. *J. Chem. Phys.* **1993**, *98*, 5648. (b) Lee, C.; Yang, W.; Parr, R. G. *Phys. Rev. B* **1988**, *37*, 785.

(3) Frisch, M. J.; Trucks, G. W.; Schlegel, H. B.; Scuseria, G. E.; Robb, M. A.; Cheeseman, J. R.; Montgomery, J. A.; Vreven, Jr. T.; Kudin, K. N.; Burant, J. C.; Millam, J. M.; Iyengar, S. S.; Tomasi, J.; Barone, V.; Mennucci, B.; Cossi, M.; Scalmani, G.; Rega, N.; Petersson, G. A.; Nakatsuji, H.; Hada, M.; Ehara, M.; Toyota, K.; Fukuda, R.; Hasegawa, J.; Ishida, M.; Nakajima, T.; Honda, Y.; Kitao, O.; Nakai, H.; Klene, M.; Li, X.; Knox, J. E.; Hratchian, H. P.; Cross, J. B.; Adamo, C.; Jaramillo, J.; Gomperts, R.; Stratmann, R. E.; Yazyev, O.; Austin, A. J.; Cammi, R.; Pomelli, C.; Ochterski, J. W.; Ayala, P. Y.; Morokuma, K.; Voth, G. A.; Salvador, P.; Dannenberg, J. J.; Zakrzewski, V. G.; Dapprich, S.; Daniels, A. D.; Strain, M. C.; Farkas, O.; Malick, D. K.; Rabuck, A. D.; Raghavachari, K.; Foresman, J. B.; Ortiz, J. V.; Cui, Q.; Baboul, A. G.; Clifford, S.; Cioslowski, J.; Stefanov, B. B.; Liu, G.; Liashenko, A.; Piskorz, P.; Komaromi, I.; Martin, R. L.; Fox, D. J.; Keith, T.; Al-Laham, M. A.; Peng, C. Y.; Nanayakkara, A.; Challacombe, M.; Gill, P. M. W.; Johnson, B.; Chen, W.; Wong, M. W.; Gonzalez, C.; Pople, J. A. *Gaussian 03*, revision E.01; Gaussian Inc.: Pittsburgh PA, 2007.

(4) (a) Dunning, T. H.; Hay, P. J. In *Modern Theoretical Chemistry*; Schaefer, H. F., Ed.; Plenum: New York, 1976; Vol. 3, p 1. (b) Hay, P. J.; Wadt, W. R. *J. Chem. Phys.* **1985**, *82*, 270. (c) Wadt, W. R.; Hay, P. J. *J. Chem. Phys.* **1985**, *82*, 284. (d) Hay, P. J.; Wadt, W. R. *J. Chem. Phys.* **1985**, *82*, 299.

(5) (a) Yang, W.-W.; Zhong, Y.-W.; Yoshikawa, S.; Shao, J.-Y.; Masaoka, S.; Sakai, K.; Yao, J.; Haga, M.-a. *Inorg. Chem.* **2012**, *51*, 890. (b) Wadman, S. H.; Havenith, R. W. A.; Hartl, F.; Lutz, M.; Spek, A. L.; van Klink G. P. M.; van Koten, G. *Inorg. Chem.* **2009**, *48*, 5685.

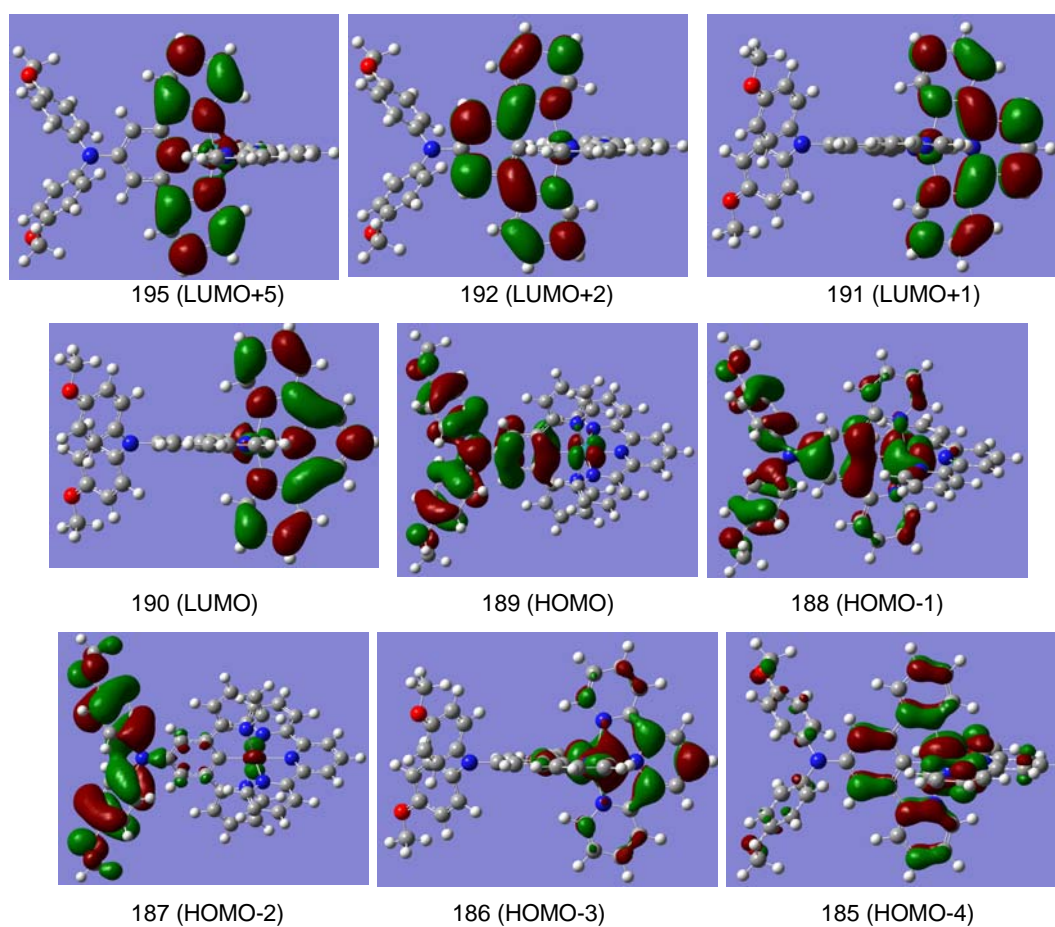

**Figure S1.** Isodensity plots of selected frontier orbitals for  $1^+$ .

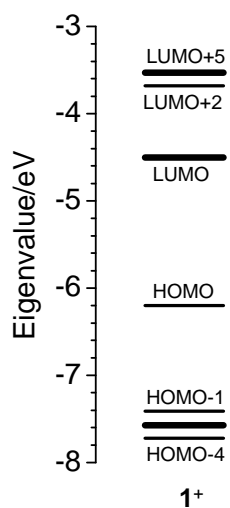

**Figure S2.** Energy level alignment for  $1^+$ .

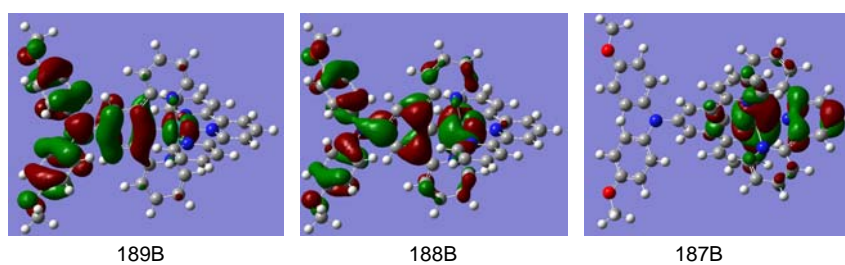

**Figure S3.** Isodensity plots of selected frontier orbitals for  $1^{2+}$ .

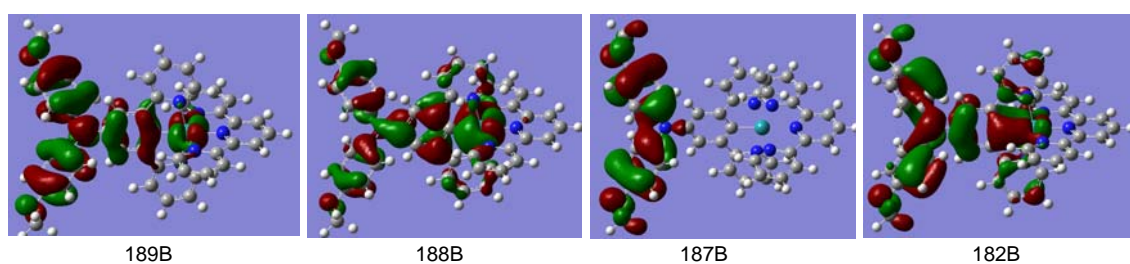

**Figure S4.** Isodensity plots of selected frontier orbitals for  $1^{3+}$ .

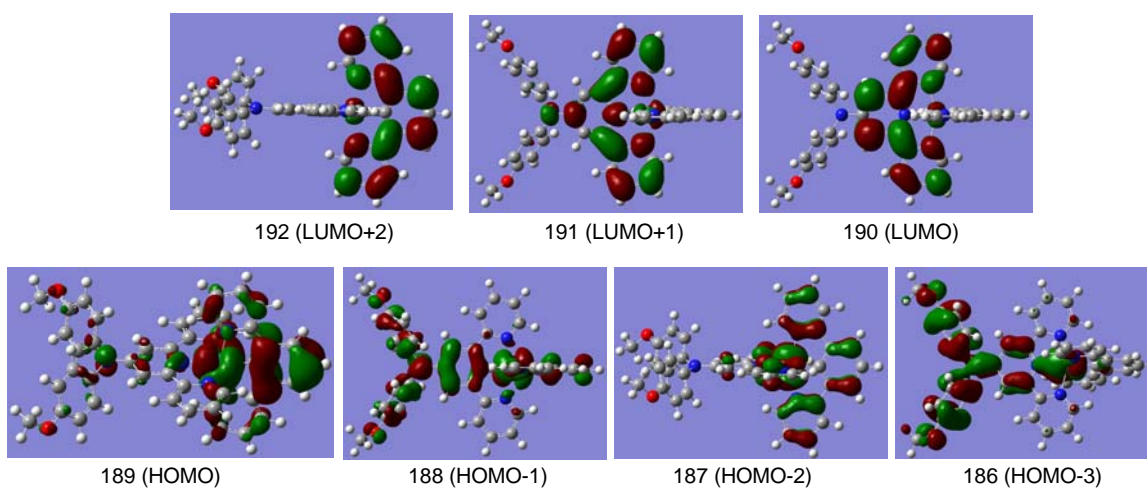

**Figure S5.** Isodensity plots of selected frontier orbitals for  $2^{+}$ .

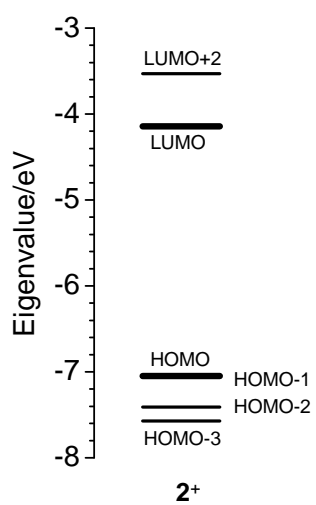

**Figure S6.** Energy level alignment for  $2^+$ .

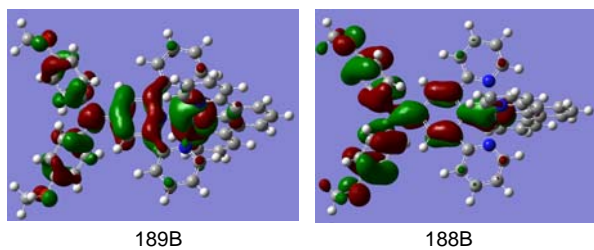

**Figure S7.** Isodensity plots of selected frontier orbitals for  $2^+$ .

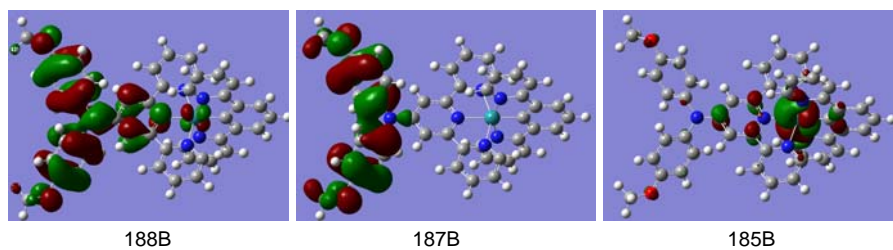

**Figure S8.** Isodensity plots of selected frontier orbitals for  $2^+$ .



**Table S1.** Calculated main low-energy excitations of complexes studied.<sup>a</sup>

| compound              | S <sub>n</sub> | E/eV | E/nm | f      | dominant transitions (configuration coefficient)                            |
|-----------------------|----------------|------|------|--------|-----------------------------------------------------------------------------|
| <b>1<sup>+</sup></b>  | 3              | 2.01 | 616  | 0.0347 | 189 (HOMO) → 192 (LUMO+2) (0.703)                                           |
|                       | 6              | 2.23 | 556  | 0.0185 | 189 (HOMO) → 195 (LUMO+5) (0.68)                                            |
|                       | 11             | 2.34 | 531  | 0.0437 | 186 (HOMO-3) → 191 (LUMO+1) (0.657);<br>185 (HOMO-4) → 190 (LUMO) (0.209)   |
|                       | 12             | 2.68 | 463  | 0.1215 | 185 (HOMO-4) → 191 (LUMO+1) (0.4192);<br>186 (HOMO-3) → 190 (LUMO) (0.4555) |
| <b>1<sup>2+</sup></b> | 1              | 1.20 | 1036 | 0.102  | 187B → 189B (0.81); 188B → 189B (-0.55)                                     |
|                       | 2              | 1.23 | 1007 | 0.244  | 187B → 189B (0.58); 188B → 189B (0.75)                                      |
| <b>1<sup>3+</sup></b> | 5              | 1.64 | 756  | 0.191  | 187B → 189B (0.98)                                                          |
|                       | 7              | 1.74 | 712  | 0.1104 | 182B → 188B (0.8964)                                                        |
| <b>2<sup>+</sup></b>  | 3              | 2.14 | 578  | 0.0154 | 188 (HOMO-1) → 190 (LUMO) (0.654)                                           |
|                       | 4              | 2.27 | 545  | 0.0783 | 188 (HOMO-1) → 191 (LUMO+1) (0.568)                                         |
|                       | 5              | 2.40 | 516  | 0.0353 | 187 (HOMO-2) → 191 (LUMO+1) (0.682)                                         |
|                       | 6              | 2.61 | 475  | 0.1515 | 187 (HOMO-2) → 190 (LUMO) (0.62)                                            |
|                       | 7              | 2.78 | 445  | 0.0627 | 189 (HOMO) → 192 (LUMO+2) (0.67)                                            |
| <b>2<sup>2+</sup></b> | 3              | 0.92 | 1346 | 0.290  | 188B → 189B (0.91)                                                          |
| <b>2<sup>3+</sup></b> | 3              | 1.39 | 892  | 0.208  | 187B → 188B (0.9976)                                                        |
|                       | 6              | 1.55 | 799  | 0.134  | 185B → 188B (0.9677)                                                        |

<sup>a</sup>Calculated on the level of B3LYP/LanL2DZ/6-31G\*/vacuum theory.

Cartesian coordinates for DFT-optimized structure of  $\mathbf{1}^+$ :

Charge = 1 multiplicity = 1

|    |             |             |             |
|----|-------------|-------------|-------------|
| C  | -0.34880242 | 0.94042121  | 0.77191848  |
| C  | -1.75014753 | 0.93094294  | 0.78496869  |
| C  | 0.35885386  | -0.00007006 | -0.00005069 |
| C  | 0.53087003  | 1.84678154  | 1.51849746  |
| C  | -2.46148550 | -0.00002491 | -0.00026009 |
| C  | -0.34871420 | -0.94053982 | -0.77213045 |
| N  | 1.87738064  | 1.62021108  | 1.33737319  |
| C  | 0.10289389  | 2.88047195  | 2.36362491  |
| Ru | 2.34156496  | -0.00002274 | 0.00002506  |
| H  | -2.31740547 | 1.63176722  | 1.38971468  |
| C  | -1.75005226 | -0.93101114 | -0.78538898 |
| C  | 0.53104193  | -1.84694277 | -1.51856503 |
| N  | -3.87440724 | -0.00001363 | -0.00039543 |
| C  | 2.76503530  | 2.39992339  | 1.98151616  |
| C  | 1.03042249  | 3.67757749  | 3.02244248  |
| N  | 1.87752720  | -1.62031342 | -1.33736991 |
| N  | 4.40964395  | 0.00006140  | -0.00001320 |
| N  | 2.80535601  | -1.31953761 | 1.59510437  |
| N  | 2.80522273  | 1.31958536  | -1.59508844 |
| H  | -0.96004136 | 3.05089204  | 2.49560225  |
| C  | 2.39313033  | 3.43489594  | 2.83021268  |
| C  | 0.10315592  | -2.88074927 | -2.36359689 |
| C  | 2.76525679  | -2.40006542 | -1.98136151 |
| C  | -4.59923507 | -1.22583352 | -0.09119640 |
| C  | -4.59917941 | 1.22582684  | 0.09075577  |
| C  | 5.06063179  | -0.75772250 | 0.91370229  |
| C  | 5.06054794  | 0.75790732  | -0.91373243 |
| C  | 4.14994071  | -1.50025071 | 1.81276737  |
| C  | 4.14978635  | 1.50036751  | -1.81278481 |
| C  | 1.92935920  | -1.96956302 | 2.38429376  |
| C  | 1.92916188  | 1.96956791  | -2.38423347 |
| H  | -2.31724728 | -1.63180077 | -1.39023599 |
| H  | 3.81062448  | 2.17328120  | 1.79964052  |
| H  | 0.69774015  | 4.47777477  | 3.67692823  |
| C  | 1.03075879  | -3.67791994 | -3.02223165 |
| C  | 2.39344588  | -3.43516879 | -2.82993945 |
| C  | -4.27740729 | 2.31725951  | -0.72369612 |
| C  | -5.66841440 | 1.35664089  | 0.99463663  |
| C  | -5.66884340 | -1.35660493 | -0.99464381 |
| C  | -4.27721240 | -2.31728338 | 0.72314297  |
| C  | 6.45880587  | -0.77398606 | 0.93263009  |
| C  | 6.45872273  | 0.77433255  | -0.93264918 |
| C  | 2.32427071  | -2.81789749 | 3.41348808  |
| C  | 4.60214974  | -2.34194136 | 2.83343076  |
| C  | 4.60192064  | 2.34205812  | -2.83348358 |
| C  | 2.32399476  | 2.81793326  | -3.41343573 |
| H  | 3.15323844  | 4.03111759  | 3.32342161  |
| H  | -0.95976461 | -3.05121546 | -2.49563422 |
| H  | 3.81082354  | -2.17333289 | -1.79947141 |
| H  | 0.88352384  | -1.78808947 | 2.16444356  |
| H  | 0.88334310  | 1.78802006  | -2.16436469 |
| C  | -4.98498310 | 3.51876239  | -0.63587645 |

|   |             |             |             |
|---|-------------|-------------|-------------|
| C | -6.39079056 | 2.53890119  | 1.07188643  |
| C | -6.39132264 | -2.53882242 | -1.07158956 |
| C | -4.98489373 | -3.51874450 | 0.63561352  |
| C | 7.15336958  | 0.00021535  | -0.00000730 |
| C | 3.68691077  | -3.00801330 | 3.64301050  |
| C | 3.68661739  | 3.00809126  | -3.64302258 |
| H | 0.69815013  | -4.47822180 | -3.67662698 |
| H | 3.15360517  | -4.03143502 | -3.32301577 |
| H | -3.46401003 | 2.22813506  | -1.43794024 |
| H | -5.93444778 | 0.51811520  | 1.63079954  |
| H | -5.93508867 | -0.51807859 | -1.63071663 |
| H | -3.46352896 | -2.22821268 | 1.43706632  |
| H | 7.00410011  | -1.37255634 | 1.65368172  |
| H | 7.00394765  | 1.37297436  | -1.65369330 |
| H | 1.57329747  | -3.31501751 | 4.01818823  |
| H | 5.66631007  | -2.47428602 | 2.99358696  |
| H | 5.66606776  | 2.47442522  | -2.99370729 |
| H | 1.57297745  | 3.31503593  | -4.01809531 |
| C | -6.05418202 | 3.63470958  | 0.26112938  |
| C | -6.05445581 | -3.63464460 | -0.26096484 |
| H | -4.70749938 | 4.34310484  | -1.28303692 |
| H | -7.22088307 | 2.64260646  | 1.76353898  |
| H | -7.22169721 | -2.64247395 | -1.76291156 |
| H | -4.70719398 | -4.34309848 | 1.28266684  |
| H | 8.23850881  | 0.00028448  | 0.00000367  |
| H | 4.03238611  | -3.66209737 | 4.43729859  |
| H | 4.03203186  | 3.66217693  | -4.43733632 |
| O | -6.82021747 | 4.75033042  | 0.42202032  |
| O | -6.82060462 | -4.75023542 | -0.42155546 |
| C | -6.55644986 | 5.87421894  | -0.40279561 |
| C | -6.55674848 | -5.87403056 | 0.40335648  |
| H | -5.54416437 | 6.26771917  | -0.23836413 |
| H | -7.28749484 | 6.63274606  | -0.11830520 |
| H | -6.68073296 | 5.63159959  | -1.46644224 |
| H | -5.54459380 | -6.26774727 | 0.23863283  |
| H | -7.28802921 | -6.63247575 | 0.11925238  |
| H | -6.68060871 | -5.63120805 | 1.46700589  |

Cartesian coordinates for DFT-optimized structure of  $\mathbf{1}^{2+}$ :

Charge = 2 multiplicity = 2

|    |             |             |             |
|----|-------------|-------------|-------------|
| C  | -0.35738562 | 0.92943458  | 0.80347791  |
| C  | -1.74838310 | 0.93064507  | 0.80387627  |
| C  | 0.35203039  | -0.00047203 | -0.00064143 |
| C  | 0.52729428  | 1.81007632  | 1.58671560  |
| C  | -2.45122821 | -0.00055049 | -0.00149629 |
| C  | -0.35682796 | -0.93041501 | -0.80518533 |
| N  | 1.86915478  | 1.58376907  | 1.39081533  |
| C  | 0.10014992  | 2.80829171  | 2.46808282  |
| Ru | 2.30259430  | -0.00030082 | -0.00002806 |
| H  | -2.32112639 | 1.61043644  | 1.42644226  |
| C  | -1.74780828 | -0.93163603 | -0.80656573 |
| C  | 0.52849819  | -1.81081635 | -1.58801809 |
| N  | -3.85947921 | -0.00046885 | -0.00180286 |
| C  | 2.76123120  | 2.33651873  | 2.05850202  |
| C  | 1.03295008  | 3.58027692  | 3.15430526  |
| N  | 1.87021315  | -1.58480737 | -1.39072218 |
| N  | 4.39744855  | 0.00004164  | 0.00017630  |
| N  | 2.79203514  | -1.36453278 | 1.56725529  |
| N  | 2.79181226  | 1.36504234  | -1.56596116 |
| H  | -0.96133894 | 2.97684481  | 2.61456009  |
| C  | 2.39186370  | 3.34147705  | 2.94648546  |
| C  | 0.10203474  | -2.80850692 | -2.47029005 |
| C  | 2.76277549  | -2.33777180 | -2.05750401 |
| C  | -4.57939294 | -1.21802016 | -0.08883450 |
| C  | -4.57900582 | 1.21733619  | 0.08619736  |
| C  | 5.04525218  | -0.77871628 | 0.89218646  |
| C  | 5.04516129  | 0.77687993  | -0.89356749 |
| C  | 4.13666063  | -1.54414957 | 1.77689536  |
| C  | 4.13641225  | 1.54514014  | -1.77559942 |
| C  | 1.92252120  | -2.03518107 | 2.34527210  |
| C  | 1.92214069  | 2.03840670  | -2.34150955 |
| H  | -2.32009052 | -1.61109883 | -1.42989524 |
| H  | 3.80581675  | 2.11589387  | 1.86646446  |
| H  | 0.70524211  | 4.35520896  | 3.84030860  |
| C  | 1.03535052  | -3.58033136 | -3.15600287 |
| C  | 2.39409982  | -3.34215432 | -2.94643190 |
| C  | -4.16987846 | 2.34699924  | -0.64555407 |
| C  | -5.73350600 | 1.30286034  | 0.89615415  |
| C  | -5.73407392 | -1.30395779 | -0.89856152 |
| C  | -4.17080352 | -2.34710328 | 0.64419420  |
| C  | 6.44401499  | -0.79983928 | 0.91052656  |
| C  | 6.44392429  | 0.79282544  | -0.91656269 |
| C  | 2.32397040  | -2.90359343 | 3.35583010  |
| C  | 4.59641034  | -2.40433929 | 2.77734497  |
| C  | 4.59590905  | 2.40923114  | -2.77279346 |
| C  | 2.32336192  | 2.91033019  | -3.34910539 |
| H  | 3.15461409  | 3.91781344  | 3.45863811  |
| H  | -0.95934566 | -2.97684490 | -2.61779745 |
| H  | 3.80723347  | -2.11793900 | -1.86384940 |
| H  | 0.87414818  | -1.85712381 | 2.13707444  |
| H  | 0.87380609  | 1.85965827  | -2.13372174 |
| C  | -4.88784467 | 3.53445836  | -0.57980156 |

|   |             |             |             |
|---|-------------|-------------|-------------|
| C | -6.44671618 | 2.48212295  | 0.96860360  |
| C | -6.44777358 | -2.48299915 | -0.96969510 |
| C | -4.88924674 | -3.53431365 | 0.57974724  |
| C | 7.13781140  | -0.00481967 | -0.00420065 |
| C | 3.68707529  | -3.09207649 | 3.57675336  |
| C | 3.68641635  | 3.09983950  | -3.56951991 |
| H | 0.70815953  | -4.35467059 | -3.84292084 |
| H | 3.15725227  | -3.91848384 | -3.45799222 |
| H | -3.30290320 | 2.27995490  | -1.29470290 |
| H | -6.04885961 | 0.44280402  | 1.47715854  |
| H | -6.04912599 | -0.44444705 | -1.48051358 |
| H | -3.30385340 | -2.27969846 | 1.29333972  |
| H | 6.98997430  | -1.41649243 | 1.61509523  |
| H | 6.98981878  | 1.40694878  | -1.62338841 |
| H | 1.57755596  | -3.41614605 | 3.95300594  |
| H | 5.66116901  | -2.53541952 | 2.93232412  |
| H | 5.66064819  | 2.54139560  | -2.92700514 |
| H | 1.57679747  | 3.42495696  | -3.94430789 |
| C | -6.03859822 | 3.61422706  | 0.22879080  |
| C | -6.04013829 | -3.61446630 | -0.22863591 |
| H | -4.56631748 | 4.38276009  | -1.17200760 |
| H | -7.32728749 | 2.56765138  | 1.59631925  |
| H | -7.32838913 | -2.56887845 | -1.59730326 |
| H | -4.56792849 | -4.38215426 | 1.17272929  |
| H | 8.22293898  | -0.00701091 | -0.00616134 |
| H | 4.03873412  | -3.76048891 | 4.35607241  |
| H | 4.03788882  | 3.77127053  | -4.34632067 |
| O | -6.80936002 | 4.70274955  | 0.36387641  |
| O | -6.81121114 | -4.70288003 | -0.36270794 |
| C | -6.49138583 | 5.89402832  | -0.36261798 |
| C | -6.49415745 | -5.89328531 | 0.36564843  |
| H | -5.50528974 | 6.27686324  | -0.07614762 |
| H | -7.25885112 | 6.61645671  | -0.08672437 |
| H | -6.52638371 | 5.71440726  | -1.44295051 |
| H | -5.50856000 | -6.27757695 | 0.07941979  |
| H | -7.26246085 | -6.61539460 | 0.09125804  |
| H | -6.52855402 | -5.71183022 | 1.44569092  |

Cartesian coordinates for DFT-optimized structure of  $\mathbf{1}^{3+}$ :

Charge =3 multiplicity = 3

|    |             |             |             |
|----|-------------|-------------|-------------|
| C  | -0.35665645 | 0.89342671  | 0.85154871  |
| C  | -1.75520041 | 0.88831903  | 0.85327264  |
| C  | 0.32780589  | 0.00016404  | 0.00024610  |
| C  | 0.53152657  | 1.74341662  | 1.67503268  |
| C  | -2.44368372 | 0.00021159  | -0.00005108 |
| C  | -0.35645706 | -0.89309557 | -0.85124774 |
| N  | 1.87403677  | 1.53320617  | 1.46753937  |
| C  | 0.09933435  | 2.69305053  | 2.60077551  |
| Ru | 2.28938102  | 0.00010082  | 0.00039140  |
| H  | -2.33252629 | 1.53673071  | 1.50406753  |
| C  | -1.75494445 | -0.88793354 | -0.85324478 |
| C  | 0.53177030  | -1.74326022 | -1.67470533 |
| N  | -3.87256474 | 0.00015607  | -0.00020615 |
| C  | 2.76525930  | 2.25440151  | 2.16548074  |
| C  | 1.03307577  | 3.43760479  | 3.32349689  |
| N  | 1.87429637  | -1.53335685 | -1.46714080 |
| N  | 4.43682190  | -0.00066323 | -0.00030575 |
| N  | 2.83818355  | -1.41925116 | 1.50357440  |
| N  | 2.83824576  | 1.42125150  | -1.50110352 |
| H  | -0.96183062 | 2.85069437  | 2.75979381  |
| C  | 2.39028491  | 3.21625240  | 3.10263785  |
| C  | 0.09945667  | -2.69276367 | -2.60046599 |
| C  | 2.76541485  | -2.25472597 | -2.16500589 |
| C  | -4.58554469 | -1.21737473 | -0.01909406 |
| C  | -4.58565556 | 1.21763273  | 0.01859609  |
| C  | 5.08543774  | -0.81226813 | 0.85717053  |
| C  | 5.08547585  | 0.81006031  | -0.85858284 |
| C  | 4.17899522  | -1.61231303 | 1.70918269  |
| C  | 4.17906133  | 1.61205605  | -1.70879004 |
| C  | 1.95495650  | -2.11189232 | 2.24789667  |
| C  | 1.95504133  | 2.11639613  | -2.24311657 |
| H  | -2.33216353 | -1.53635207 | -1.50412846 |
| H  | 3.81107978  | 2.05032133  | 1.96321210  |
| H  | 0.70275651  | 4.17688964  | 4.04645480  |
| C  | 1.03311582  | -3.43753253 | -3.32315457 |
| C  | 2.39033792  | -3.21650510 | -3.10221918 |
| C  | -4.15211771 | 2.32658302  | -0.74212505 |
| C  | -5.77367310 | 1.32908535  | 0.78597579  |
| C  | -5.77351731 | -1.32890730 | -0.78653758 |
| C  | -4.15191792 | -2.32632662 | 0.74157244  |
| C  | 6.48410181  | -0.83500212 | 0.87813341  |
| C  | 6.48414123  | 0.83056618  | -0.88159070 |
| C  | 2.34871013  | -3.02217826 | 3.22431054  |
| C  | 4.62839096  | -2.51442972 | 2.67498641  |
| C  | 4.62848559  | 2.51421410  | -2.67454103 |
| C  | 2.34882138  | 3.02678026  | -3.21942867 |
| H  | 3.15101129  | 3.77148629  | 3.64047633  |
| H  | -0.96172090 | -2.85020932 | -2.75958508 |
| H  | 3.81126034  | -2.05086525 | -1.96263719 |
| H  | 0.90781585  | -1.92194824 | 2.04633106  |
| H  | 0.90789189  | 1.92828980  | -2.03987494 |
| C  | -4.88254400 | 3.50259788  | -0.75914532 |

|   |             |             |             |
|---|-------------|-------------|-------------|
| C | -6.49747904 | 2.49921258  | 0.78211961  |
| C | -6.49721027 | -2.49910296 | -0.78276615 |
| C | -4.88222657 | -3.50241502 | 0.75849869  |
| C | 7.17847751  | -0.00281661 | -0.00227894 |
| C | 3.70952261  | -3.22802220 | 3.44226182  |
| C | 3.70963859  | 3.23020107  | -3.43960727 |
| H | 0.70265995  | -4.17673359 | -4.04613741 |
| H | 3.15098072  | -3.77190336 | -3.64000394 |
| H | -3.26114136 | 2.24318644  | -1.35603494 |
| H | -6.09823052 | 0.49595393  | 1.39988210  |
| H | -6.09813040 | -0.49577977 | -1.40041975 |
| H | -3.26095875 | -2.24288673 | 1.35550258  |
| H | 7.02899525  | -1.47954976 | 1.55791807  |
| H | 7.02906701  | 1.47438389  | -1.56204060 |
| H | 1.59680778  | -3.55330691 | 3.79767112  |
| H | 5.69130142  | -2.65926074 | 2.82967306  |
| H | 5.69139842  | 2.65728969  | -2.83083627 |
| H | 1.59693266  | 3.55990079  | -3.79095513 |
| C | -6.07379227 | 3.60410820  | 0.00015166  |
| C | -6.07344396 | -3.60399741 | -0.00083874 |
| H | -4.54962808 | 4.33005029  | -1.37413806 |
| H | -7.39592464 | 2.60793435  | 1.38024901  |
| H | -7.39562221 | -2.60788209 | -1.38093567 |
| H | -4.54923766 | -4.32987403 | 1.37344321  |
| H | 8.26380565  | -0.00368420 | -0.00307553 |
| H | 4.05330380  | -3.92980063 | 4.19544570  |
| H | 4.05343828  | 3.93202955  | -4.19273594 |
| O | -6.85458288 | 4.67617356  | 0.05471961  |
| O | -6.85411895 | -4.67614088 | -0.05549712 |
| C | -6.54736405 | 5.85751832  | -0.70913580 |
| C | -6.54680312 | -5.85749747 | 0.70830304  |
| H | -5.58460362 | 6.27552458  | -0.39853351 |
| H | -7.34738173 | 6.56009007  | -0.48186315 |
| H | -6.54389079 | 5.63014054  | -1.77964300 |
| H | -5.58399036 | -6.27538748 | 0.39770784  |
| H | -7.34674216 | -6.56013775 | 0.48096583  |
| H | -6.54338681 | -5.63017912 | 1.77882307  |

Cartesian coordinates for DFT-optimized structure of  $2^+$ :

Charge = 1 multiplicity = 1

|    |             |             |             |
|----|-------------|-------------|-------------|
| C  | -0.28615612 | 1.13405794  | -0.31006911 |
| C  | -1.67636181 | 1.16788236  | -0.32515112 |
| N  | 0.37518627  | -0.00125563 | -0.00131435 |
| C  | 0.62429009  | 2.26491025  | -0.61664970 |
| C  | -2.40904750 | -0.00194979 | -0.00235502 |
| C  | -0.28584124 | -1.13694616 | 0.30673553  |
| N  | 1.97066698  | 1.99701215  | -0.54456104 |
| C  | 0.16818526  | 3.54098040  | -0.95823248 |
| Ru | 2.45739296  | -0.00060950 | 0.00004082  |
| H  | -2.21015842 | 2.07175579  | -0.58605674 |
| C  | -1.67603049 | -1.17153273 | 0.32064214  |
| C  | 0.62490559  | -2.26734847 | 0.61410186  |
| C  | 2.84146125  | 2.98880817  | -0.81165612 |
| C  | 1.07853963  | 4.55766664  | -1.23234469 |
| N  | 1.97120401  | -1.99864084 | 0.54371438  |
| C  | 4.43221304  | 0.00000532  | 0.00168145  |
| N  | 2.90690858  | -0.55283072 | -2.02660289 |
| N  | 2.90315592  | 0.55199631  | 2.02738605  |
| N  | -3.79282129 | -0.00149962 | -0.00229979 |
| H  | -0.89700505 | 3.73693263  | -1.00710414 |
| C  | 2.44196454  | 4.27552188  | -1.15790725 |
| C  | 0.16912437  | -3.54378930 | 0.95473568  |
| C  | 2.84225479  | -2.99005699 | 0.81137202  |
| C  | 5.13570418  | -0.32450782 | -1.17813916 |
| C  | 5.13350805  | 0.32474488  | 1.18275038  |
| C  | 4.25305836  | -0.63244739 | -2.30837246 |
| C  | 4.24877892  | 0.63231083  | 2.31145569  |
| C  | 2.01860882  | -0.81446122 | -3.00308762 |
| C  | 2.01304980  | 0.81336846  | 3.00229268  |
| C  | -4.54048460 | -1.22853480 | -0.03921015 |
| C  | -4.53762694 | 1.22736938  | 0.03707863  |
| H  | -2.20948513 | -2.07591544 | 0.58040470  |
| H  | 3.88911110  | 2.72007425  | -0.73938938 |
| H  | 0.72819609  | 5.55013392  | -1.49795960 |
| C  | 1.07974458  | -4.56006782 | 1.22948828  |
| C  | 2.44309205  | -4.27713325 | 1.15666324  |
| C  | 6.53916127  | -0.32321700 | -1.17174741 |
| C  | 6.53697006  | 0.32396533  | 1.17882800  |
| C  | 2.38871545  | -1.16632630 | -4.29501555 |
| C  | 4.67925592  | -0.98417227 | -3.59717459 |
| C  | 4.67258860  | 0.98444193  | 3.60093430  |
| C  | 2.38076164  | 1.16562338  | 4.29479510  |
| C  | -4.38670316 | 2.12281958  | 1.10855227  |
| C  | -5.45531382 | 1.52550043  | -0.97232900 |
| C  | -5.47152559 | -1.51440250 | 0.96155368  |
| C  | -4.37950381 | -2.13478134 | -1.10017030 |
| H  | 3.19044521  | 5.03373276  | -1.36216656 |
| H  | -0.89600960 | -3.74035788 | 1.00237366  |
| H  | 3.88983504  | -2.72070468 | 0.74041240  |
| H  | 0.97359660  | -0.73380536 | -2.72173649 |
| H  | 0.96856704  | 0.73213984  | 2.71915448  |
| C  | 7.22649780  | 0.00049683  | 0.00414653  |



|   |             |             |             |
|---|-------------|-------------|-------------|
| C | 3.75084948  | -1.25254283 | -4.59493714 |
| C | 3.74233640  | 1.25252996  | 4.59705420  |
| C | -5.12552883 | 3.29671267  | 1.15349507  |
| C | -6.21535036 | 2.69563756  | -0.92675131 |
| C | -6.23464009 | -2.68257720 | 0.91773554  |
| C | -5.12123151 | -3.30691877 | -1.14281605 |
| H | 0.72965906  | -5.55282790 | 1.49434730  |
| H | 3.19176873  | -5.03500666 | 1.36145607  |
| H | 7.11017522  | -0.56884626 | -2.06432354 |
| H | 7.10632514  | 0.56977011  | 2.07241396  |
| H | 1.62765876  | -1.36595396 | -5.04175942 |
| H | 5.74188087  | -1.04367689 | -3.80646733 |
| H | 5.73482360  | 1.04451892  | 3.81203360  |
| H | 1.61832285  | 1.36501256  | 5.04019169  |
| H | -3.68998281 | 1.89075423  | 1.90925279  |
| H | -5.58733666 | 0.83136148  | -1.79683040 |
| H | -5.61172740 | -0.81216068 | 1.77776692  |
| H | -3.67225839 | -1.91289326 | -1.89448649 |
| C | -6.05039094 | 3.59358900  | 0.13722879  |
| C | -6.05949755 | -3.59129798 | -0.13534172 |
| H | 8.31225119  | 0.00068798  | 0.00510650  |
| H | 4.08216659  | -1.52457111 | -5.59275491 |
| H | 4.07180123  | 1.52488637  | 5.59539566  |
| H | -5.02073299 | 3.99485088  | 1.97777602  |
| H | -6.92377269 | 2.89650537  | -1.72170236 |
| H | -6.95338011 | -2.87352237 | 1.70583576  |
| H | -5.00842397 | -4.01317754 | -1.95908873 |
| O | -6.72781032 | 4.76053575  | 0.28073326  |
| O | -6.73881715 | -4.75754522 | -0.27600524 |
| C | -7.69978081 | 5.11021188  | -0.69789589 |
| C | -7.72342773 | -5.09499039 | 0.69422046  |
| H | -7.24524782 | 5.22872907  | -1.68974968 |
| H | -8.11616959 | 6.06505391  | -0.37456541 |
| H | -8.50120377 | 4.36259491  | -0.75065434 |
| H | -7.28119827 | -5.20493397 | 1.69260380  |
| H | -8.13856072 | -6.05186179 | 0.37529184  |
| H | -8.52336725 | -4.34477355 | 0.72997557  |

Cartesian coordinates for DFT-optimized structure of  $2^{2+}$ :

Charge = 2 multiplicity = 2

|    |             |             |             |
|----|-------------|-------------|-------------|
| C  | 0.28302395  | -1.12480223 | -0.38258257 |
| C  | 1.66397744  | -1.15857914 | -0.39199723 |
| N  | -0.37855459 | 0.00001144  | -0.00006947 |
| C  | -0.62869541 | -2.23602481 | -0.76797618 |
| C  | 2.39897760  | 0.00000561  | -0.00001785 |
| C  | 0.28301442  | 1.12481649  | 0.38248583  |
| N  | -1.97337842 | -1.97610311 | -0.67652248 |
| C  | -0.17471616 | -3.48405951 | -1.19662411 |
| Ru | -2.42739809 | -0.00000574 | -0.00004057 |
| H  | 2.20161822  | -2.04130797 | -0.71010515 |
| C  | 1.66396726  | 1.15858889  | 0.39194501  |
| C  | -0.62871258 | 2.23603592  | 0.76786997  |
| C  | -2.85056038 | -2.93937862 | -1.00486239 |
| C  | -1.09158402 | -4.47763789 | -1.53763912 |
| N  | -1.97339391 | 1.97610607  | 0.67641575  |
| C  | -4.44208236 | -0.00003408 | 0.00011888  |
| N  | -2.92125292 | 0.67243619  | -1.97994708 |
| N  | -2.92092862 | -0.67250358 | 1.97994065  |
| N  | 3.77044338  | 0.00001762  | -0.00001253 |
| H  | 0.88889794  | -3.68243865 | -1.26370508 |
| C  | -2.45331594 | -4.20173634 | -1.43987747 |
| C  | -0.17474098 | 3.48407683  | 1.19650798  |
| C  | -2.85058145 | 2.93938191  | 1.00473966  |
| C  | -5.13869636 | 0.39627691  | -1.15391789 |
| C  | -5.13850741 | -0.39634309 | 1.15426868  |
| C  | -4.25968689 | 0.77467592  | -2.26363284 |
| C  | -4.25931746 | -0.77474722 | 2.26383857  |
| C  | -2.01427440 | 0.99169302  | -2.92357078 |
| C  | -2.01380324 | -0.99179110 | 2.92341272  |
| C  | 4.51863405  | 1.22447149  | -0.03229716 |
| C  | 4.51866479  | -1.22441995 | 0.03226914  |
| H  | 2.20160172  | 2.04131483  | 0.71007316  |
| H  | -3.89750861 | -2.67472186 | -0.91062264 |
| H  | -0.74418633 | -5.44969793 | -1.87286874 |
| C  | -1.09161476 | 4.47765419  | 1.53751004  |
| C  | -2.45334490 | 4.20174598  | 1.43974327  |
| C  | -6.54301649 | 0.39519973  | -1.15027887 |
| C  | -6.54282805 | -0.39526629 | 1.15085939  |
| C  | -2.37438552 | 1.42834594  | -4.19125945 |
| C  | -4.67461248 | 1.21056979  | -3.52817444 |
| C  | -4.67404413 | -1.21066292 | 3.52843812  |
| C  | -2.37371412 | -1.42846955 | 4.19114932  |
| C  | 4.26668889  | -2.19311734 | 1.02158173  |
| C  | 5.54358492  | -1.43835473 | -0.89793168 |
| C  | 5.54369430  | 1.43834158  | 0.89776456  |
| C  | 4.26647771  | 2.19326061  | -1.02147488 |
| H  | -3.20244333 | -4.94389681 | -1.69337929 |
| H  | 0.88887182  | 3.68246294  | 1.26358830  |
| H  | -3.89752788 | 2.67471832  | 0.91050050  |
| H  | -0.97248691 | 0.88793923  | -2.64031200 |
| H  | -0.97205955 | -0.88804019 | 2.63999301  |
| C  | -7.23177925 | -0.00003293 | 0.00034673  |

|   |             |             |             |
|---|-------------|-------------|-------------|
| C | -3.73356340 | 1.53944595  | -4.49647229 |
| C | -3.73284337 | -1.53956482 | 4.49657934  |
| C | 5.01499132  | -3.35693508 | 1.06170585  |
| C | 6.30035363  | -2.60547531 | -0.86205265 |
| C | 6.30042984  | 2.60548284  | 0.86187852  |
| C | 5.01474514  | 3.35710024  | -1.06160325 |
| H | -0.74422293 | 5.44971920  | 1.87273135  |
| H | -3.20247690 | 4.94390576  | 1.69323347  |
| H | -7.10890440 | 0.69623029  | -2.02773275 |
| H | -7.10857298 | -0.69629832 | 2.02840474  |
| H | -1.60700855 | 1.67286239  | -4.91734759 |
| H | -5.73439460 | 1.28836186  | -3.74356684 |
| H | -5.73379245 | -1.28845582 | 3.74399620  |
| H | -1.60622207 | -1.67300847 | 4.91710830  |
| H | 3.50083534  | -2.01681076 | 1.77133765  |
| H | 5.74679804  | -0.68952816 | -1.65696545 |
| H | 5.74704236  | 0.68944872  | 1.65669674  |
| H | 3.50051271  | 2.01700822  | -1.77112968 |
| C | 6.04152071  | -3.57927314 | 0.11991304  |
| C | 6.04141752  | 3.57937122  | -0.11995044 |
| H | -8.31693245 | -0.00003346 | 0.00043535  |
| H | -4.05347212 | 1.87744233  | -5.47727991 |
| H | -4.05259734 | -1.87757969 | 5.47743105  |
| H | 4.84739276  | -4.10677611 | 1.82764103  |
| H | 7.08313606  | -2.75087572 | -1.59657091 |
| H | 7.08332482  | 2.75083006  | 1.59628731  |
| H | 4.84700716  | 4.10701187  | -1.82743879 |
| O | 6.70820493  | -4.73819155 | 0.25035914  |
| O | 6.70805026  | 4.73831994  | -0.25038557 |
| C | 7.79457603  | -5.02991112 | -0.63464143 |
| C | 7.79453793  | 5.02999009  | 0.63448855  |
| H | 7.45065035  | -5.08892130 | -1.67359869 |
| H | 8.17421298  | -6.00143834 | -0.31957704 |
| H | 8.58673617  | -4.27832208 | -0.54400501 |
| H | 7.45076100  | 5.08887259  | 1.67350218  |
| H | 8.17408709  | 6.00156778  | 0.31947405  |
| H | 8.58671670  | 4.27844456  | 0.54365451  |

Cartesian coordinates for DFT-optimized structure of  $2^{3+}$ :

Charge = 3 multiplicity = 3

|    |             |             |             |
|----|-------------|-------------|-------------|
| C  | 0.28502595  | -1.06785154 | -0.50376335 |
| C  | 1.67999921  | -1.09969052 | -0.51888708 |
| N  | -0.36659386 | -0.00001704 | 0.00002204  |
| C  | -0.62389084 | -2.12166858 | -1.01447550 |
| C  | 2.39133814  | -0.00000250 | -0.00003228 |
| C  | 0.28503476  | 1.06782504  | 0.50377957  |
| N  | -1.96533885 | -1.86461350 | -0.89236140 |
| C  | -0.17677319 | -3.31231920 | -1.58824852 |
| Ru | -2.50768082 | -0.00003108 | 0.00006991  |
| H  | 2.22064577  | -1.93858801 | -0.93816353 |
| C  | 1.68000827  | 1.09967967  | 0.51884585  |
| C  | -0.62387260 | 2.12163302  | 1.01452684  |
| C  | -2.84902407 | -2.77967573 | -1.33340079 |
| C  | -1.09708075 | -4.25518165 | -2.04517812 |
| N  | -1.96532270 | 1.86456042  | 0.89247320  |
| C  | -4.45078487 | -0.00003440 | 0.00011862  |
| N  | -2.91545431 | 0.91245415  | -1.91986739 |
| N  | -2.91535584 | -0.91252231 | 1.92002635  |
| N  | 3.80558618  | 0.00001333  | -0.00006889 |
| H  | 0.88565560  | -3.50666586 | -1.68105211 |
| C  | -2.45661006 | -3.98356832 | -1.91440594 |
| C  | -0.17674431 | 3.31229186  | 1.58827444  |
| C  | -2.84899964 | 2.77961401  | 1.33354718  |
| C  | -5.14002058 | 0.53230659  | -1.11888309 |
| C  | -5.13996334 | -0.53237669 | 1.11915489  |
| C  | -4.25724906 | 1.03824446  | -2.18518008 |
| C  | -4.25713709 | -1.03831381 | 2.18540709  |
| C  | -2.02608159 | 1.34023532  | -2.83004718 |
| C  | -2.02593674 | -1.34030872 | 2.83015841  |
| C  | 4.52299192  | 1.19379888  | -0.24239589 |
| C  | 4.52304216  | -1.19375039 | 0.24222146  |
| H  | 2.22066314  | 1.93858652  | 0.93809335  |
| H  | -3.89607749 | -2.53038264 | -1.21268962 |
| H  | -0.75559177 | -5.18249442 | -2.49382609 |
| C  | -1.09704328 | 4.25514489  | 2.04524070  |
| C  | -2.45657493 | 3.98351400  | 1.91452977  |
| C  | -6.53693010 | 0.52864096  | -1.11043691 |
| C  | -6.53687332 | -0.52871596 | 1.11077757  |
| C  | -2.40224337 | 1.91208516  | -4.04319884 |
| C  | -4.69243317 | 1.60469023  | -3.38513681 |
| C  | -4.69226008 | -1.60476269 | 3.38538456  |
| C  | -2.40203674 | -1.91216246 | 4.04332738  |
| C  | 4.10788784  | -2.09961858 | 1.24957994  |
| C  | 5.69071446  | -1.47740103 | -0.50415596 |
| C  | 5.69070435  | 1.47747963  | 0.50390731  |
| C  | 4.10773536  | 2.09966710  | -1.24971152 |
| H  | -3.21107328 | -4.68520466 | -2.25354954 |
| H  | 0.88568618  | 3.50665248  | 1.68102928  |
| H  | -3.89605521 | 2.53030761  | 1.21288271  |
| H  | -0.97991465 | 1.21635455  | -2.57130867 |
| H  | -0.97978290 | -1.21643015 | 2.57136565  |
| C  | -7.21670876 | -0.00003872 | 0.00018709  |

|   |             |             |             |
|---|-------------|-------------|-------------|
| C | -3.76111385 | 2.04636018  | -4.32400626 |
| C | -3.76089287 | -2.04643616 | 4.32420475  |
| C | 4.84134852  | -3.23651742 | 1.50301055  |
| C | 6.42864657  | -2.62121708 | -0.25823576 |
| C | 6.42858127  | 2.62132348  | 0.25795102  |
| C | 4.84114070  | 3.23659368  | -1.50317797 |
| H | -0.75554597 | 5.18246415  | 2.49386892  |
| H | -3.21103195 | 4.68514270  | 2.25370295  |
| H | -7.11608031 | 0.92348877  | -1.93968804 |
| H | -7.11598130 | -0.92356627 | 1.94005694  |
| H | -1.64391456 | 2.24081152  | -4.74532292 |
| H | -5.75416418 | 1.69875264  | -3.58425124 |
| H | -5.75398093 | -1.69882532 | 3.58455316  |
| H | -1.64367224 | -2.24089297 | 4.74541096  |
| H | 3.23619562  | -1.87591286 | 1.85612944  |
| H | 5.99512922  | -0.80507503 | -1.29937820 |
| H | 5.99519495  | 0.80515469  | 1.29910150  |
| H | 3.23600560  | 1.87594186  | -1.85620034 |
| C | 6.01812282  | -3.51796293 | 0.75658223  |
| C | 6.01795767  | 3.51806828  | -0.75682772 |
| H | -8.30234558 | -0.00004069 | 0.00021392  |
| H | -4.09372871 | 2.48688990  | -5.25869048 |
| H | -4.09346002 | -2.48696835 | 5.25890478  |
| H | 4.55998336  | -3.92707246 | 2.29089646  |
| H | 7.30591783  | -2.82888159 | -0.85908847 |
| H | 7.30588603  | 2.82901023  | 0.85874709  |
| H | 4.55969645  | 3.92715067  | -2.29103394 |
| O | 6.64634332  | -4.63684393 | 1.08620883  |
| O | 6.64611694  | 4.63697549  | -1.08648193 |
| C | 7.87711620  | -5.01688879 | 0.43409499  |
| C | 7.87692120  | 5.01705417  | -0.43444712 |
| H | 7.70538024  | -5.18755937 | -0.63295327 |
| H | 8.17883740  | -5.94508514 | 0.91604314  |
| H | 8.64099139  | -4.24893526 | 0.58704672  |
| H | 7.70525229  | 5.18770425  | 0.63261521  |
| H | 8.17857710  | 5.94526760  | -0.91640327 |
| H | 8.64081258  | 4.24912928  | -0.58746159 |

**EPR measurement:**

The EPR measurement of  $\mathbf{1}^{2+}$  (as-prepared sample) was performed in a solution in acetonitrile at room temperature on a Bruker ELEXSYS E500-10/12 spectrometer. The spectrometer frequency  $\nu$  is  $9.51 \times 10^9$  Hz.
